# Supplementary material for: Temperature and duration of exposure drive infection intensity with the amphibian pathogen Batrachochytrium dendrobatidis
Source: PeerJ. 2022 Feb 7;10:e12889. doi: 10.7717/peerj.12889 (PMC8830297; doi:10.7717/peerj.12889)
Supplement: Supplemental Information 1 — The raw data is showing infection load, Gosner development stage, time spent in water, and density of 148 Alytes obstetricans larvae sampled at two sites during the four sampling events (April, July, October and January) [file peerj-10-12889-s001.xlsx]

## Sheet: RawData
sampling_month	site	gosner	water temperature	density	time in water	Bd load
1_April	La Marlota	36	14.5	low	1_3months_or_more	18.2134
1_April	La Marlota	28	14.5	low	1_3months_or_more	57.0119
1_April	La Marlota	38	14.5	low	1_3months_or_more	1355.9
1_April	La Marlota	36	14.5	low	1_3months_or_more	102.186
1_April	La Marlota	33	14.5	low	1_3months_or_more	641.028
1_April	La Marlota	36	14.5	low	1_3months_or_more	977.852
1_April	La Marlota	36	14.5	low	1_3months_or_more	767.223
1_April	La Marlota	38	14.5	low	1_3months_or_more	96.2367
1_April	La Marlota	33	14.5	low	1_3months_or_more	173.698
1_April	La Marlota	28	14.5	low	1_3months_or_more	392.762
1_April	La Marlota	36	14.5	low	1_3months_or_more	78.0279
1_April	La Marlota	36	14.5	low	1_3months_or_more	412.522
1_April	La Marlota	37	14.5	low	1_3months_or_more	97.5009
1_April	La Marlota	36	14.5	low	1_3months_or_more	50.8519
1_April	La Marlota	33	14.5	low	1_3months_or_more	289.566
1_April	La Marlota	33	14.5	low	1_3months_or_more	220.85
1_April	La Marlota	33	14.5	low	1_3months_or_more	751.329
1_April	Picarrico	33	13.4	high	1_3months_or_more	1657.97
1_April	Picarrico	33	13.4	high	1_3months_or_more	1993.99
1_April	Picarrico	28	13.4	high	1_3months_or_more	673.259
1_April	Picarrico	33	13.4	high	1_3months_or_more	228.776
1_April	Picarrico	28	13.4	high	1_3months_or_more	146.108
1_April	Picarrico	28	13.4	high	1_3months_or_more	1771.19
1_April	Picarrico	28	13.4	high	1_3months_or_more	943.146
1_April	Picarrico	28	13.4	high	1_3months_or_more	1376.25
1_April	Picarrico	28	13.4	high	1_3months_or_more	1432.65
1_April	Picarrico	28	13.4	high	1_3months_or_more	225.201
1_April	Picarrico	28	13.4	high	1_3months_or_more	346.418
1_April	Picarrico	28	13.4	high	1_3months_or_more	818.108
1_April	Picarrico	28	13.4	high	1_3months_or_more	1114.69
1_April	Picarrico	28	13.4	high	1_3months_or_more	1156.12
1_April	Picarrico	28	13.4	high	1_3months_or_more	280.528
1_April	Picarrico	28	13.4	high	1_3months_or_more	21.4179
1_April	Picarrico	28	13.4	high	1_3months_or_more	2204.86
1_April	Picarrico	28	13.4	high	1_3months_or_more	548.451
2_July	La Marlota	37	17.4	low	2_6months_or_more	2.06121
2_July	La Marlota	37	17.4	low	2_6months_or_more	6.07356
2_July	La Marlota	37	17.4	low	2_6months_or_more	3.86322
2_July	La Marlota	43	17.4	low	2_6months_or_more	27.4192
2_July	La Marlota	40	17.4	low	2_6months_or_more	6.42106
2_July	La Marlota	37	17.4	low	2_6months_or_more	4.79437
2_July	La Marlota	37	17.4	low	2_6months_or_more	1.68929
2_July	La Marlota	36	17.4	low	2_6months_or_more	0.440825
2_July	La Marlota	37	17.4	low	2_6months_or_more	44.7098
2_July	La Marlota	37	17.4	low	2_6months_or_more	9.10595
2_July	Picarrico	36	20.2	high	2_6months_or_more	69.542
2_July	Picarrico	36	20.2	high	2_6months_or_more	111.012
2_July	Picarrico	36	20.2	high	2_6months_or_more	304.538
2_July	Picarrico	36	20.2	high	2_6months_or_more	36.9841
2_July	Picarrico	36	20.2	high	2_6months_or_more	7.5202
2_July	Picarrico	36	20.2	high	2_6months_or_more	22.7478
2_July	Picarrico	36	20.2	high	2_6months_or_more	15.175
2_July	Picarrico	36	20.2	high	2_6months_or_more	51.2223
2_July	Picarrico	36	20.2	high	2_6months_or_more	0.55017
2_July	Picarrico	36	20.2	high	2_6months_or_more	56.1189
2_July	Picarrico	36	20.2	high	2_6months_or_more	16.9711
2_July	Picarrico	36	20.2	high	2_6months_or_more	32.078
2_July	Picarrico	36	20.2	high	2_6months_or_more	48.4039
2_July	Picarrico	36	20.2	high	2_6months_or_more	356.78
2_July	Picarrico	36	20.2	high	1_3months_or_more	25.8146
2_July	Picarrico	36	20.2	high	1_3months_or_more	47.9138
2_July	Picarrico	36	20.2	high	1_3months_or_more	159.789
2_July	Picarrico	36	20.2	high	1_3months_or_more	23.7422
2_July	Picarrico	36	20.2	high	1_3months_or_more	265.364
2_July	Picarrico	36	20.2	high	1_3months_or_more	160.74
2_July	La Marlota	37	17.4	low	1_3months_or_more	15.2036
2_July	La Marlota	37	17.4	low	1_3months_or_more	18.471
2_July	La Marlota	37	17.4	low	1_3months_or_more	59.9364
2_July	La Marlota	36	17.4	low	1_3months_or_more	17.1426
2_July	La Marlota	38	17.4	low	1_3months_or_more	31.4177
2_July	La Marlota	37	17.4	low	1_3months_or_more	32.3973
2_July	La Marlota	36	17.4	low	1_3months_or_more	15.6394
2_July	La Marlota	37	17.4	low	1_3months_or_more	4.92648
2_July	La Marlota	37	17.4	low	1_3months_or_more	52.8363
2_July	La Marlota	36	17.4	low	1_3months_or_more	0
3_October	Picarrico	33	15	high	2_6months_or_more	72.7558
3_October	Picarrico	33	15	high	1_3months_or_more	270.559
3_October	Picarrico	33	15	high	3_9months_or_more	84.0873
3_October	Picarrico	33	15	high	1_3months_or_more	795.254
3_October	Picarrico	33	15	high	3_9months_or_more	187.927
3_October	Picarrico	36	15	high	3_9months_or_more	246.904
3_October	Picarrico	28	15	high	3_9months_or_more	1049.14
3_October	Picarrico	28	15	high	3_9months_or_more	458.284
3_October	Picarrico	28	15	high	3_9months_or_more	638.182
3_October	Picarrico	28	15	high	2_6months_or_more	143.775
3_October	Picarrico	28	15	high	3_9months_or_more	292.118
3_October	Picarrico	28	15	high	1_3months_or_more	563.363
3_October	Picarrico	33	15	high	2_6months_or_more	709.01
3_October	Picarrico	33	15	high	1_3months_or_more	1442.54
3_October	Picarrico	28	15	high	3_9months_or_more	654.114
3_October	Picarrico	28	15	high	1_3months_or_more	84.0139
3_October	Picarrico	33	15	high	1_3months_or_more	304.209
3_October	Picarrico	28	15	high	2_6months_or_more	633.744
4_January	La Marlota	33	5.8	low	1_3months_or_more	616.023
4_January	La Marlota	33	5.8	low	3_9months_or_more	212.83
4_January	La Marlota	33	5.8	low	3_9months_or_more	409.549
4_January	La Marlota	33	5.8	low	1_3months_or_more	851.89
4_January	La Marlota	33	5.8	low	1_3months_or_more	2519.74
4_January	La Marlota	36	5.8	low	1_3months_or_more	88.3011
4_January	La Marlota	33	5.8	low	1_3months_or_more	2146.48
4_January	La Marlota	36	5.8	low	1_3months_or_more	333.917
4_January	Picarrico	28	4.6	low	2_6months_or_more	580.946
4_January	Picarrico	28	4.6	low	4_12months_or_more	355.845
4_January	Picarrico	33	4.6	low	1_3months_or_more	180.376
4_January	Picarrico	33	4.6	low	4_12months_or_more	81.0629
4_January	Picarrico	33	4.6	low	2_6months_or_more	73.5723
4_January	Picarrico	33	4.6	low	1_3months_or_more	94.1838
4_January	Picarrico	33	4.6	low	4_12months_or_more	82.8341
4_January	Picarrico	33	4.6	low	1_3months_or_more	34.2288
4_January	Picarrico	28	4.6	low	4_12months_or_more	119.743
4_January	Picarrico	28	4.6	low	2_6months_or_more	150.437
4_January	Picarrico	28	4.6	low	4_12months_or_more	109.234
4_January	Picarrico	28	4.6	low	4_12months_or_more	31.1152
4_January	Picarrico	28	4.6	low	2_6months_or_more	95.3896
4_January	Picarrico	28	4.6	low	1_3months_or_more	386.511
4_January	Picarrico	28	4.6	low	3_9months_or_more	62.7796
4_January	Picarrico	28	4.6	low	1_3months_or_more	973.854
4_January	Picarrico	33	4.6	low	4_12months_or_more	602.291
4_January	Picarrico	28	4.6	low	1_3months_or_more	92.1428
4_January	Picarrico	28	4.6	low	4_12months_or_more	90.8472
4_January	Picarrico	28	4.6	low	4_12months_or_more	74.1259
4_January	Picarrico	28	4.6	low	1_3months_or_more	483.967
4_January	Picarrico	33	4.6	low	1_3months_or_more	63.5385
4_January	Picarrico	33	4.6	low	3_9months_or_more	69.054
4_January	Picarrico	33	4.6	low	2_6months_or_more	352.821
4_January	Picarrico	33	4.6	low	2_6months_or_more	400.488
4_January	Picarrico	33	4.6	low	1_3months_or_more	1073.11
4_January	Picarrico	33	4.6	low	1_3months_or_more	4009.13
4_January	Picarrico	33	4.6	low	1_3months_or_more	1709.14
4_January	Picarrico	33	4.6	low	1_3months_or_more	463.574
4_January	Picarrico	33	4.6	low	1_3months_or_more	1036.69
4_January	Picarrico	33	4.6	low	1_3months_or_more	2891.31
4_January	Picarrico	33	4.6	low	1_3months_or_more	3012.41
4_January	Picarrico	33	4.6	low	2_6months_or_more	187.191
4_January	Picarrico	33	4.6	low	4_12months_or_more	149.391
4_January	Picarrico	33	4.6	low	2_6months_or_more	311.268
4_January	Picarrico	33	4.6	low	3_9months_or_more	716.412
3_October	Picarrico	28	15	high	1_3months_or_more	28.7992
3_October	Picarrico	28	15	high	1_3months_or_more	552.729
4_January	La Marlota	35	5.8	low	1_3months_or_more	1374.81
4_January	La Marlota	33	5.8	low	1_3months_or_more	727.917
4_January	La Marlota	33	5.8	low	1_3months_or_more	474.566
4_January	La Marlota	33	5.8	low	1_3months_or_more	1966.04
4_January	La Marlota	33	5.8	low	1_3months_or_more	211.998
4_January	La Marlota	35	5.8	low	1_3months_or_more	9212.39
4_January	La Marlota	28	5.8	low	1_3months_or_more	4782.97
4_January	La Marlota	33	5.8	low	1_3months_or_more	13168.3
4_January	La Marlota	35	5.8	low	1_3months_or_more	67.0128
